# Supplementary material for: A novel Ba0.95La0.05Fe0.9Nb0.1O3−δ ceramic electrode for symmetrical solid oxide fuel cells
Source: Royal Society of Chemistry journal article supplement (doi:10.1039/d1se01291f), 2021-01-01
Supplement: d1se01291f1.pdf [file d1se01291f1.pdf]

## A novel $\text{Ba}_{0.95}\text{La}_{0.05}\text{Fe}_{0.9}\text{Nb}_{0.1}\text{O}_{3-\delta}$ ceramic electrode for symmetrical solid oxide fuel cells

Zhongbiao Li<sup>a,‡</sup>, Jinpeng Wang<sup>a,‡</sup>, Jiangpeng Zhu<sup>a</sup>, Yanjun Sun<sup>c</sup>, Zhihao Wang<sup>a</sup>, Yujun Zhao<sup>a</sup>, Zhaoling Wei<sup>a,b,\*</sup>,

Zhiwen Zhu<sup>a,\*</sup>, Qiuju Zheng<sup>a,\*</sup>

<sup>a</sup> Key Laboratory of Processing and Testing Technology of Glass & Functional Ceramics of Shandong Province,  
School of Materials Science and Engineering, Qilu University of Technology (Shandong Academy of Sciences),  
Jinan, Shandong 250353, People's Republic of China

<sup>b</sup> College of Chemistry, Chemical Engineering and Materials Science, Shandong Normal University, Jinan,  
Shandong 250014, PR China

<sup>c</sup> Jingang new materials Co., Ltd., Binzhou, Shandong 256216, People's Republic of China

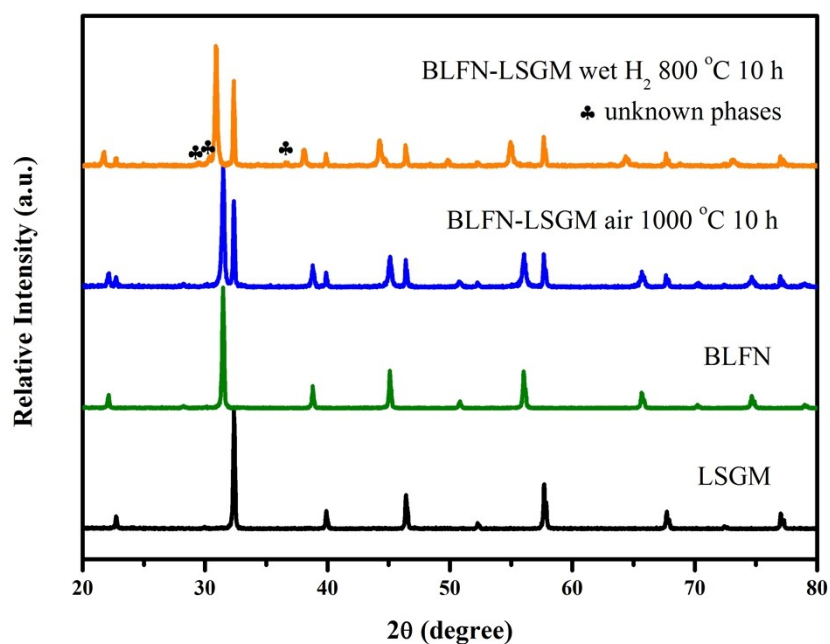

**Fig. S1** XRD patterns of BLFN-LSGM composite powders treated in air and wet  $\text{H}_2$  for 10 h.

---

\* Corresponding author:

E-mail address:

[zlwei@126.com](mailto:zlwei@126.com) (Z. Wei); [zhuzhw@qlu.edu.cn](mailto:zhuzhw@qlu.edu.cn) (Z. Zhu); [qlzhengqj@163.com](mailto:qlzhengqj@163.com) (Q. Zheng).

<sup>‡</sup> These authors contribute equally to this work.

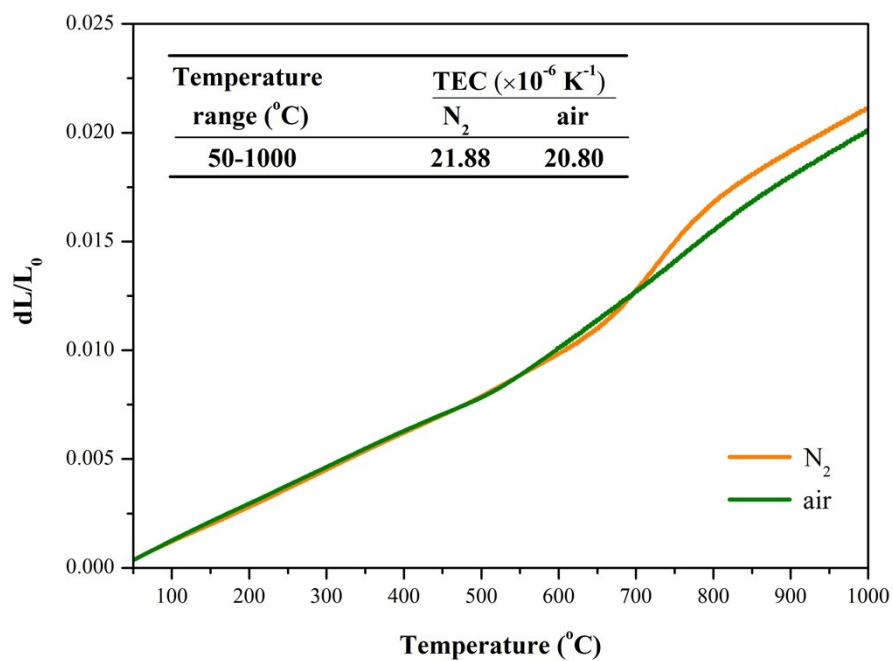

**Fig. S2** Thermal expansion behaviors of the BLFN material in air and N<sub>2</sub>.

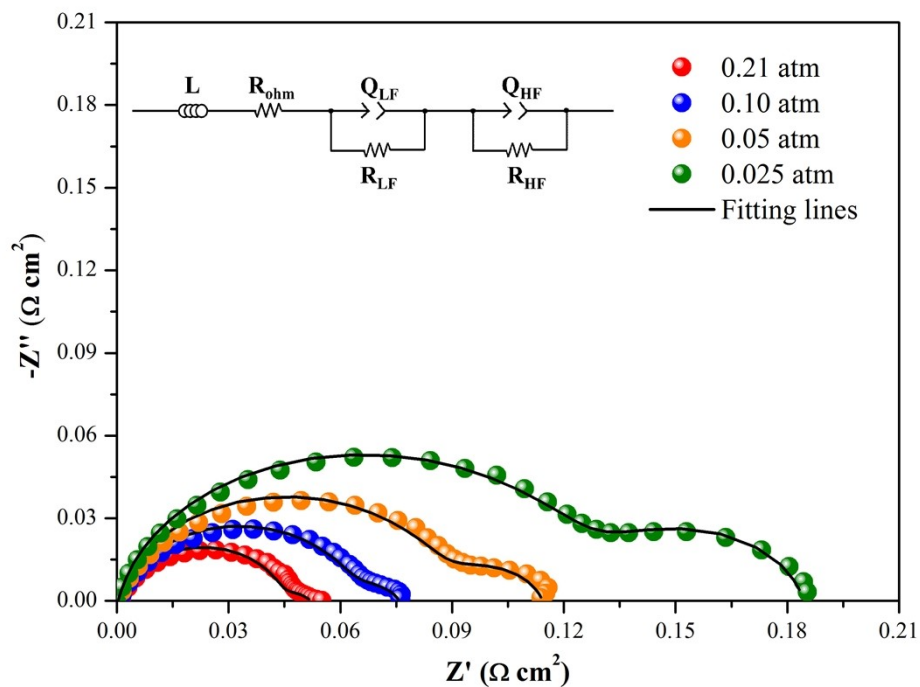

**Fig. S3** Nyquist plots of the BLFN electrode measured at 750 °C under different  $PO_2$  and  $PH_2$ , respectively. The inset is the equivalent circuit for fitting EIS.

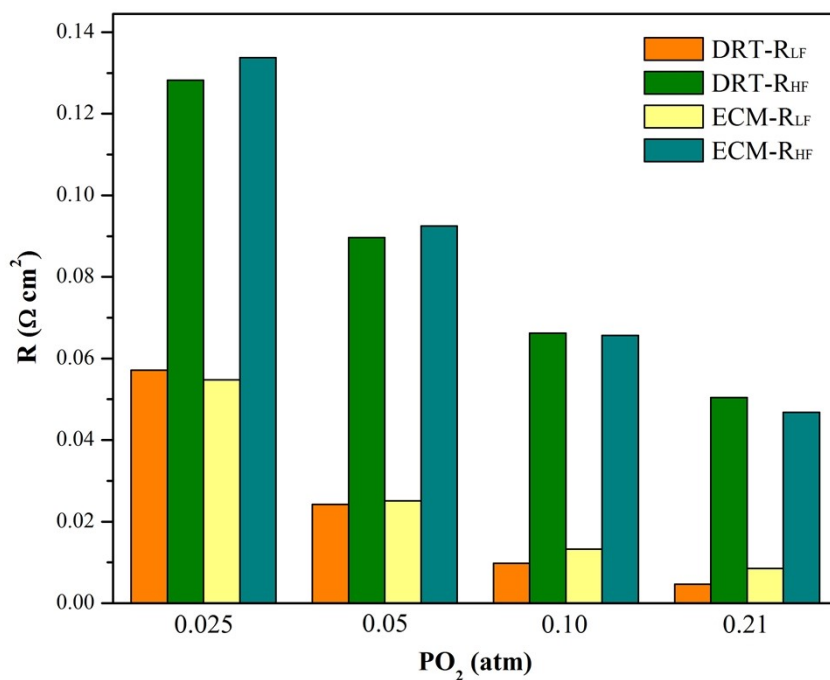

**Fig. S4** Comparison of high- and low-frequency resistances obtained from DRT analysis and equivalent circuit fitting, respectively.

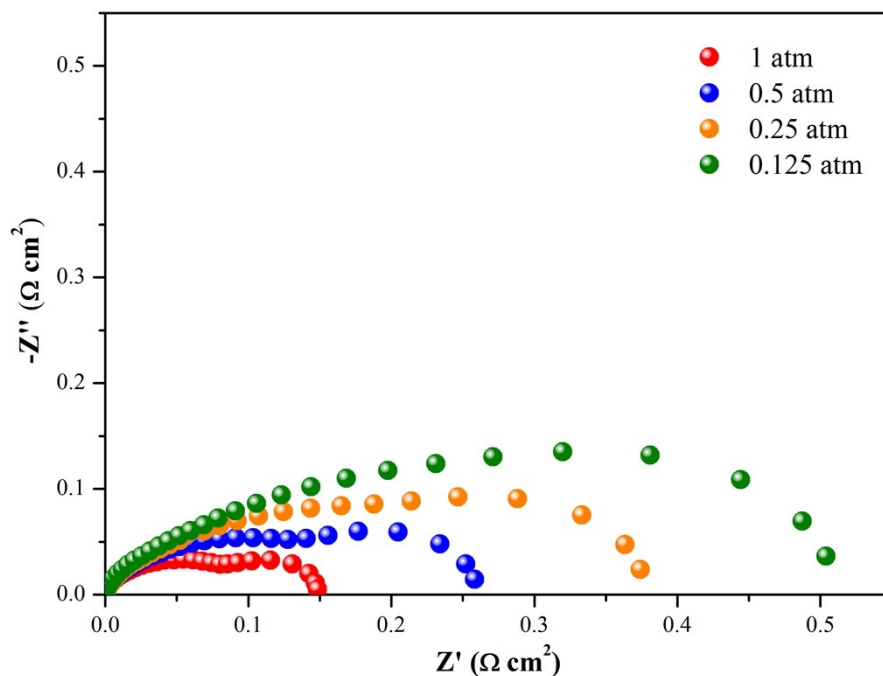

**Fig. S5** Nyquist plots of BLFN|LSGM|BLFN symmetrical cell under various hydrogen partial pressure ( $P_{H_2}$ )

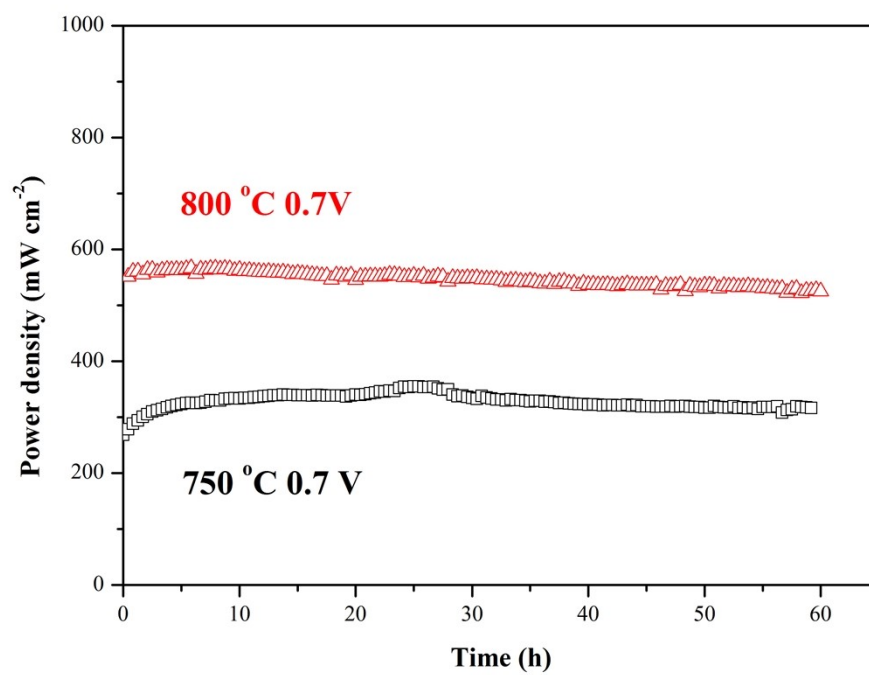

**Fig. S6** The short-term stability of the single S-SOFC with the BLFN symmetrical electrode under a constant working voltage of 0.7 V.
